# Supplementary material for: Measuring and Exploring Children’s Health Literacy in The Netherlands: Translation and Adaptation of the HLS-Child-Q15
Source: MDPI journal article supplement (doi:10.3390/ijerph18105244), 2021-05-14
Supplement: s1 [file s1]

**Table S1.** Inter-item correlations of the HLS-Child-Q15-NL.

| Inter-Item Correlation Matrix |        |        |        |        |        |        |        |        |        |         |         |         |         |         |         |
|-------------------------------|--------|--------|--------|--------|--------|--------|--------|--------|--------|---------|---------|---------|---------|---------|---------|
|                               | Item 1 | Item 2 | Item 3 | Item 4 | Item 5 | Item 6 | Item 7 | Item 8 | Item 9 | Item 10 | Item 11 | Item 12 | Item 13 | Item 14 | Item 15 |
| Item 1                        | 1.000  | 0.461  | 0.299  | 0.115  | 0.336  | 0.166  | 0.275  | 0.413  | 0.191  | 0.223   | 0.341   | 0.151   | 0.358   | 0.130   | 0.104   |
| Item 2                        | 0.461  | 1.000  | 0.311  | 0.338  | 0.310  | 0.091  | 0.208  | 0.292  | 0.171  | 0.188   | 0.436   | 0.198   | 0.238   | 0.226   | 0.392   |
| Item 3                        | 0.299  | 0.311  | 1.000  | 0.258  | 0.237  | 0.093  | 0.252  | 0.328  | 0.400  | 0.368   | 0.309   | 0.209   | 0.391   | 0.212   | 0.298   |
| Item 4                        | 0.115  | 0.338  | 0.258  | 1.000  | 0.295  | 0.117  | 0.250  | 0.226  | 0.419  | 0.120   | 0.558   | 0.009   | 0.132   | 0.290   | 0.411   |
| Item 5                        | 0.336  | 0.310  | 0.237  | 0.295  | 1.000  | 0.284  | 0.368  | 0.456  | 0.330  | 0.373   | 0.333   | 0.226   | 0.472   | 0.275   | 0.290   |
| Item 6                        | 0.166  | 0.091  | 0.093  | 0.117  | 0.284  | 1.000  | 0.301  | 0.264  | 0.340  | 0.431   | 0.345   | 0.331   | 0.266   | 0.232   | 0.182   |

|         | Item 1 | Item 2 | Item 3 | Item 4 | Item 5 | Item 6 | Item 7 | Item 8 | Item 9 | Item 10 | Item 11 | Item 12 | Item 13 | Item 14 | Item 15 |
|---------|--------|--------|--------|--------|--------|--------|--------|--------|--------|---------|---------|---------|---------|---------|---------|
| Item 7  | 0.275  | 0.208  | 0.252  | 0.250  | 0.368  | 0.301  | 1.000  | 0.441  | 0.262  | 0.336   | 0.327   | 0.208   | 0.302   | 0.266   | 0.025   |
| Item 8  | 0.413  | 0.292  | 0.328  | 0.226  | 0.456  | 0.264  | 0.441  | 1.000  | 0.370  | 0.403   | 0.356   | 0.324   | 0.358   | 0.310   | 0.179   |
| Item 9  | 0.191  | 0.171  | 0.400  | 0.419  | 0.330  | 0.340  | 0.262  | 0.370  | 1.000  | 0.455   | 0.523   | 0.444   | 0.369   | 0.201   | 0.278   |
| Item 10 | 0.223  | 0.188  | 0.368  | 0.120  | 0.373  | 0.431  | 0.336  | 0.403  | 0.455  | 1.000   | 0.344   | 0.348   | 0.262   | 0.365   | 0.110   |
| Item 11 | 0.341  | 0.436  | 0.309  | 0.558  | 0.333  | 0.345  | 0.327  | 0.356  | 0.523  | 0.344   | 1.000   | 0.282   | 0.263   | 0.391   | 0.508   |
| Item 12 | 0.151  | 0.198  | 0.209  | 0.009  | 0.226  | 0.331  | 0.208  | 0.324  | 0.444  | 0.348   | 0.282   | 1.000   | 0.388   | 0.207   | 0.249   |

|                | Item 1 | Item 2 | Item 3 | Item 4 | Item 5 | Item 6 | Item 7 | Item 8 | Item 9 | Item 10 | Item 11 | Item 12 | Item 13 | Item 14 | Item 15 |
|----------------|--------|--------|--------|--------|--------|--------|--------|--------|--------|---------|---------|---------|---------|---------|---------|
| <b>Item 13</b> | 0.358  | 0.238  | 0.391  | 0.132  | 0.472  | 0.266  | 0.302  | 0.358  | 0.369  | 0.262   | 0.263   | 0.388   | 1.000   | 0.419   | 0.277   |
| <b>Item 14</b> | 0.130  | 0.226  | 0.212  | 0.290  | 0.275  | 0.232  | 0.266  | 0.310  | 0.201  | 0.365   | 0.391   | 0.207   | 0.419   | 1.000   | 0.185   |
| <b>Item 15</b> | 0.104  | 0.392  | 0.298  | 0.411  | 0.290  | 0.182  | 0.025  | 0.179  | 0.278  | 0.110   | 0.508   | 0.249   | 0.277   | 0.185   | 1.000   |
